# Supplementary material for: Methods for estimating disease transmission rates: Evaluating the precision of Poisson regression and two novel methods
Source: PubMed Central journal article supplement (PMC5572698; doi:10.1038/s41598-017-09209-x), 2017-08-25
Supplement: 41598_2017_9209_MOESM1_ESM.pdf [file 41598_2017_9209_MOESM1_ESM.pdf]

## **Methods for estimating disease transmission rates: Evaluating the precision of Poisson regression and two novel methods**

**Carsten Kirkeby\*, Tariq Halasa\*, Maya Gussmann\*, Nils Toft\*, Kaare Græsbøll\***

\*Veterinary Institute, Technical University of Denmark, Bülowsvej 27, DK-1870 Frederiksberg C, Denmark

### **Supplementary material**

## Supplementary table

| Symbol     | Name                             | Description                                                                                                       | Value  | Reference    |
|------------|----------------------------------|-------------------------------------------------------------------------------------------------------------------|--------|--------------|
| $\beta$    | Transmission rate                | Transmission (infection) rate for individuals entering subclinical or clinical state                              | 0.0179 | <sup>1</sup> |
| $1 - \rho$ | Probability of clinical state    | Probability of acquiring clinical infection when infected                                                         | 0.83   | <sup>2</sup> |
| $\rho$     | Probability of subclinical state | Probability of acquiring clinical infection when infected                                                         | 0.17   | <sup>3</sup> |
| $\gamma_S$ | Flare up rate                    | Rate of subclinical individuals going to clinical state                                                           | 0.008  | <sup>3</sup> |
| $\alpha_S$ | Spontaneous cure probability     | Probability of spontaneous cure for subclinical individuals                                                       | 0.0064 | <sup>1</sup> |
| $\alpha_C$ | Recovery rate                    | Rate of recovery for clinical individuals that are treated going to either susceptible or subclinical individuals | 0.33   | <sup>4</sup> |
| $\eta$     | Recovery probability             | Probability of recovery for clinical individuals that are treated                                                 | 0.40   | <sup>4</sup> |
| $1 - \eta$ | Remission probability            | Probability of remission of individuals going from clinical to subclinical state                                  | 0.60   | <sup>4</sup> |

**Table 1.** Rates and probabilities used in the SIScom simulation model. All parameters are implemented in daily time steps, for all quarters. The parameters are shown in Figure 1.

## References

### 1. References

1. van den Borne, B. H., Halasa, T., van Schaik, G., Hogeveen, H. & Nielsen, M. Bioeconomic modeling of lactational antimicrobial treatment of new bovine subclinical intramammary infections caused by contagious pathogens. *J. dairy science* **93**, 4034–4044 (2010).
2. Swinkels, J., Hogeveen, H. & Zadoks, R. A partial budget model to estimate economic benefits of lactational treatment of subclinical staphylococcus aureus mastitis. *J. dairy science* **88**, 4273–4287 (2005).
3. Halasa, T., Nielsen, M., Huirne, R. & Hogeveen, H. Stochastic bio-economic model of bovine intramammary infection. *Livest. Sci.* **124**, 295–305 (2009).
4. Steeneveld, W., van Werven, T., Barkema, H. W. & Hogeveen, H. Cow-specific treatment of clinical mastitis: An economic approach. *J. Dairy Sci.* **94**, 174–188 (2011).

### Supplementary figures

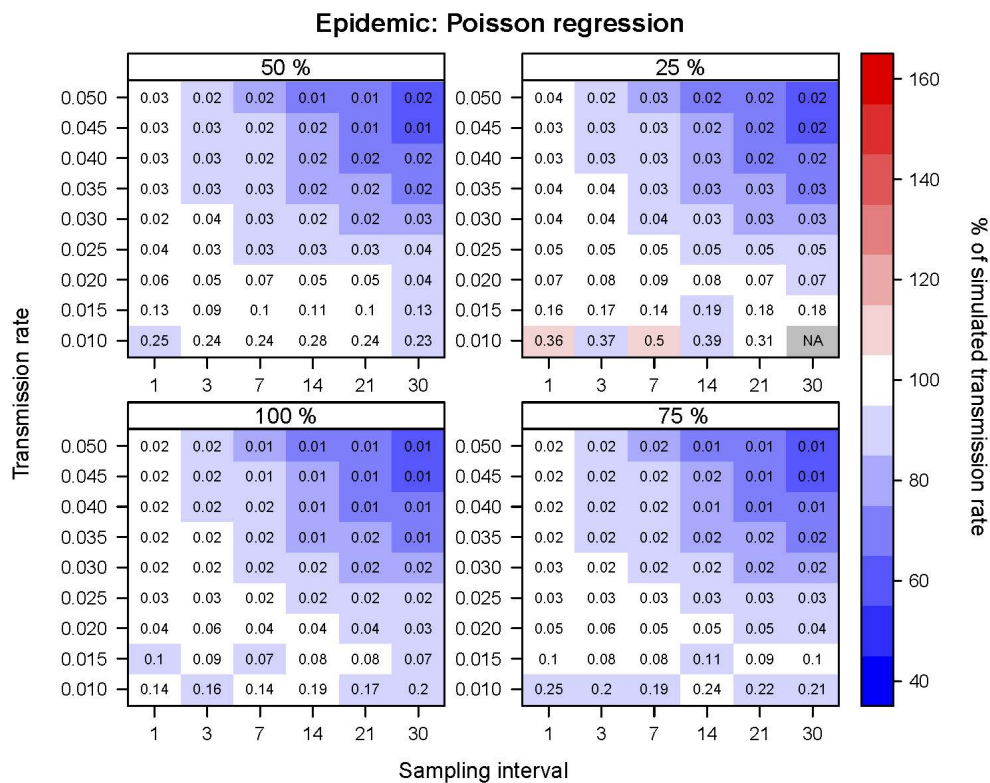

**Figure 5.** SISsim model, epidemic situation, poisson regression: Heatmaps showing the estimated transmission rates as percentage of the simulated transmission rate. The estimates are shown for four subsampling levels: 100%, 75%, 50% and 25%. Values in each cell show the relative standard deviation of the estimated rate divided by the simulated rate.

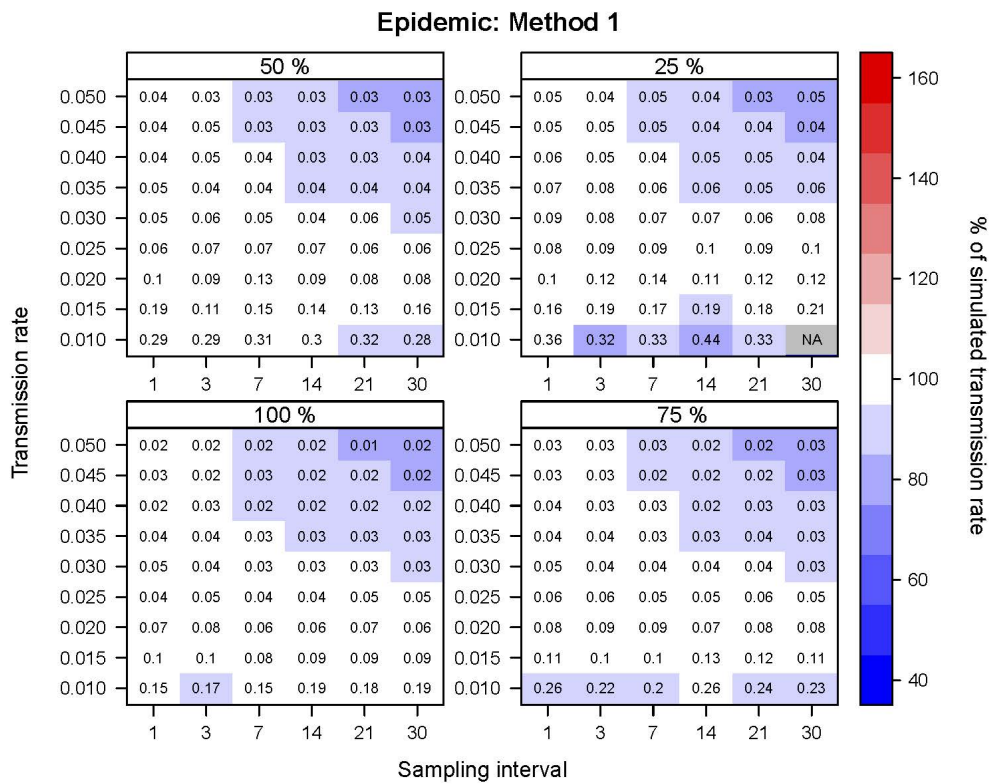

**Figure 6.** SISsim model, epidemic situation, Method 1: Heatmaps showing the estimated transmission rates as percentage of the simulated transmission rate. The estimates are shown for four subsampling levels: 100%, 75%, 50% and 25%. Values in each cell show the relative standard deviation of the estimated rate divided by the simulated rate.

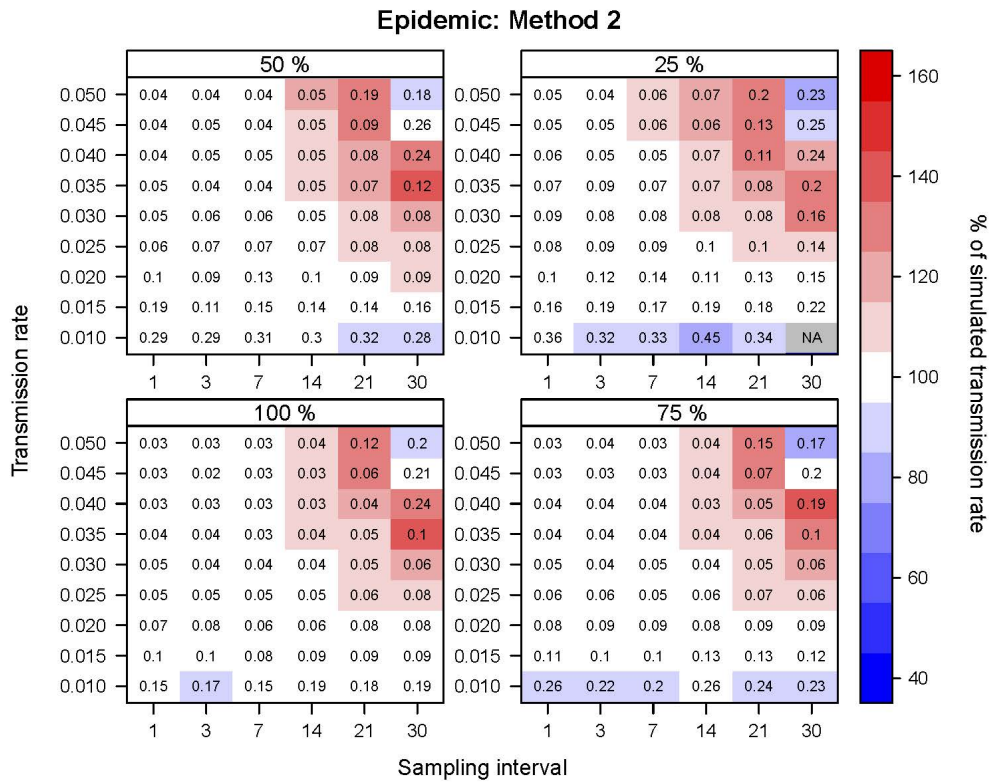

**Figure 7.** SISsim model, epidemic situation, Method 2: Heatmaps showing the estimated transmission rates as percentage of the simulated transmission rate. The estimates are shown for four subsampling levels: 100%, 75%, 50% and 25%. Values in each cell show the relative standard deviation of the estimated rate divided by the simulated rate.

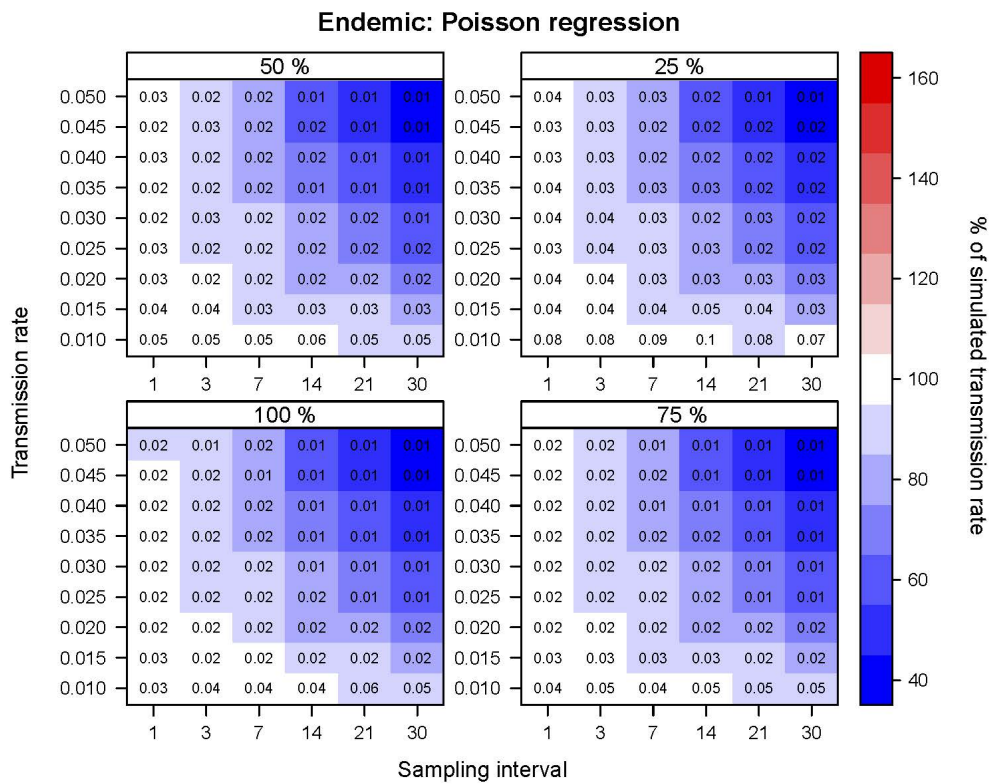

**Figure 8.** SISsim model, endemic situation, Poisson regression: Heatmaps showing the estimated transmission rates as percentage of the simulated transmission rate. The estimates are shown for four subsampling levels: 100%, 75%, 50% and 25%. Values in each cell show the relative standard deviation of the estimated rate divided by the simulated rate.

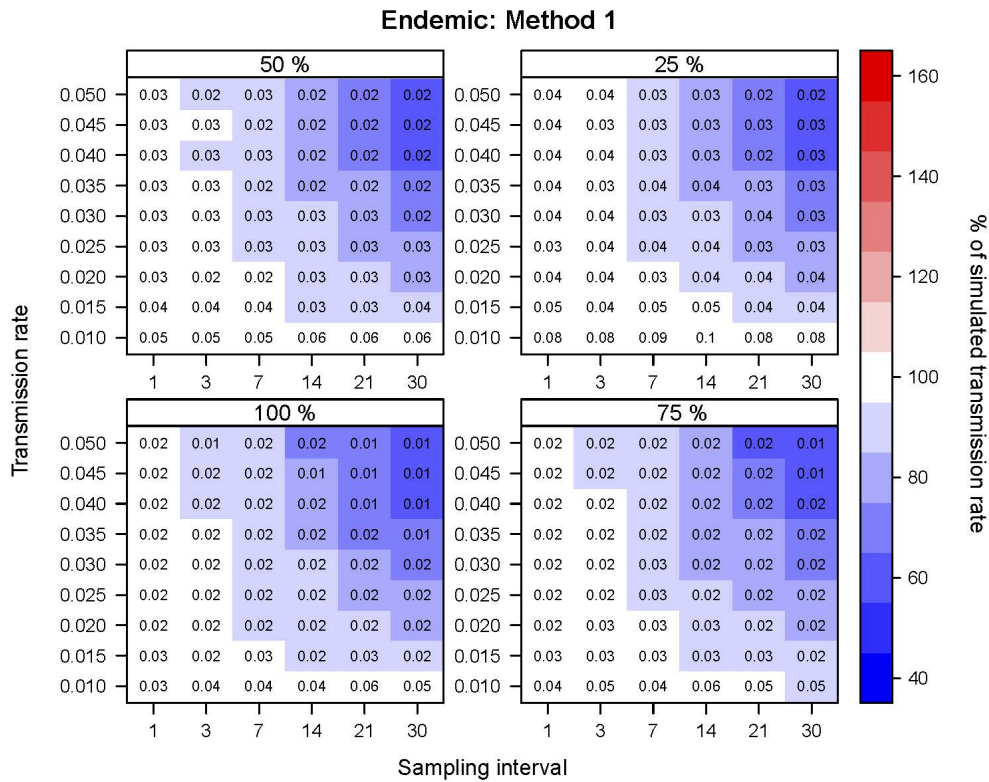

**Figure 9.** SISsim model, endemic situation, Method 1: Heatmaps showing the estimated transmission rates as percentage of the simulated transmission rate. The estimates are shown for four subsampling levels: 100%, 75%, 50% and 25%. Values in each cell show the relative standard deviation of the estimated rate divided by the simulated rate.

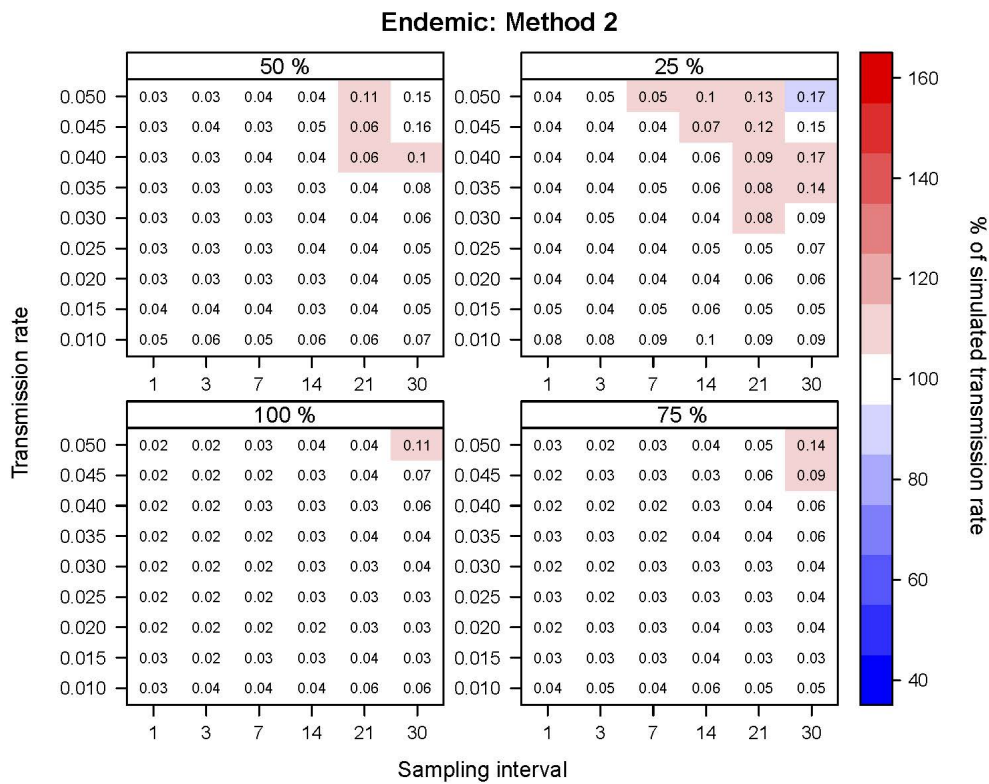

**Figure 10.** SISsim model, endemic situation, Method 2: Heatmaps showing the estimated transmission rates as percentage of the simulated transmission rate. The estimates are shown for four subsampling levels: 100%, 75%, 50% and 25%. Values in each cell show the relative standard deviation of the estimated rate divided by the simulated rate.



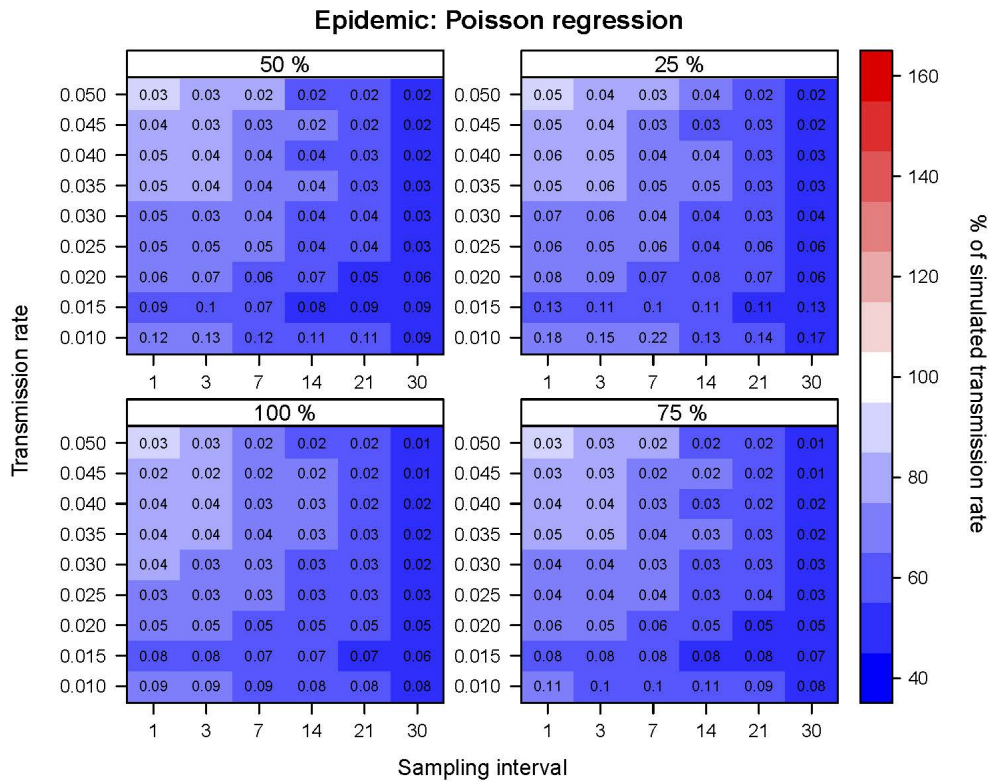

**Figure 11.** SIScom model, epidemic situation, poisson regression: Heatmaps showing the estimated transmission rates as percentage of the simulated transmission rate. The estimates are shown for four subsampling levels: 100%, 75%, 50% and 25%. Values in each cell show the relative standard deviation of the estimated rate divided by the simulated rate.

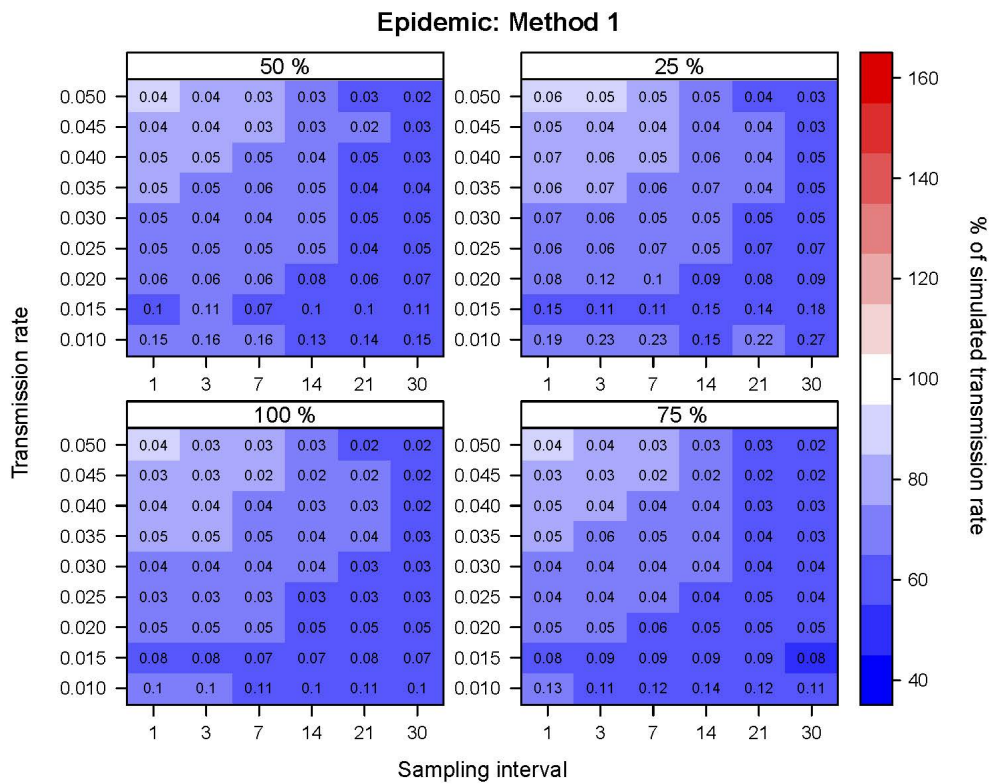

**Figure 12.** SIScom model, epidemic situation, Method 1: Heatmaps showing the estimated transmission rates as percentage of the simulated transmission rate. The estimates are shown for four subsampling levels: 100%, 75%, 50% and 25%. Values in each cell show the relative standard deviation of the estimated rate divided by the simulated rate.

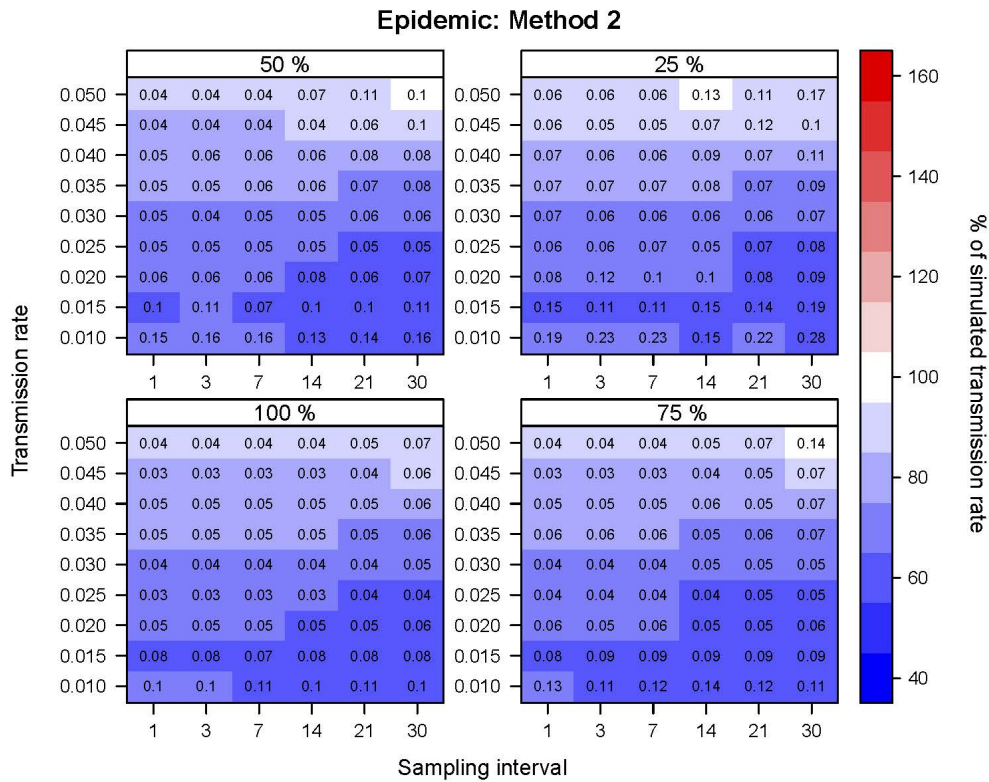

**Figure 13.** SIScom model, epidemic situation, Method 2: Heatmaps showing the estimated transmission rates as percentage of the simulated transmission rate. The estimates are shown for four subsampling levels: 100%, 75%, 50% and 25%. Values in each cell show the relative standard deviation of the estimated rate divided by the simulated rate.

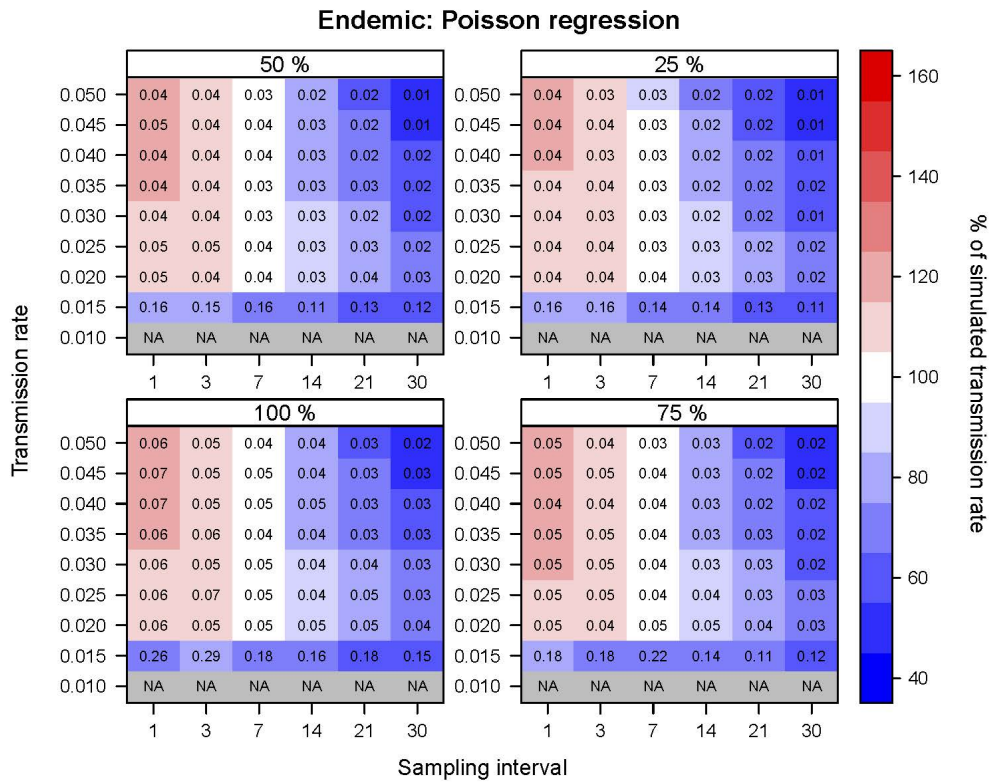

**Figure 14.** SIScom model, endemic situation, poisson regression: Heatmaps showing the estimated transmission rates as percentage of the simulated transmission rate. The estimates are shown for four subsampling levels: 100%, 75%, 50% and 25%. Values in each cell show the relative standard deviation of the estimated rate divided by the simulated rate.

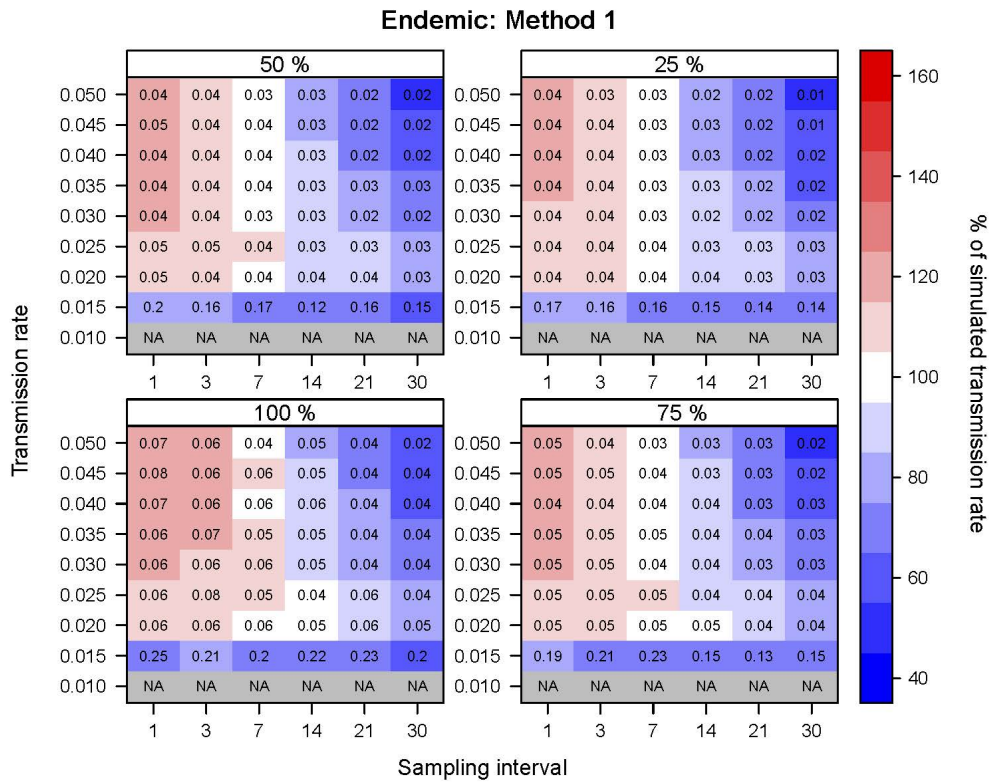

**Figure 15.** SIScom model, endemic situation, Method 1: Heatmaps showing the estimated transmission rates as percentage of the simulated transmission rate. The estimates are shown for four subsampling levels: 100%, 75%, 50% and 25%. Values in each cell show the relative standard deviation of the estimated rate divided by the simulated rate.

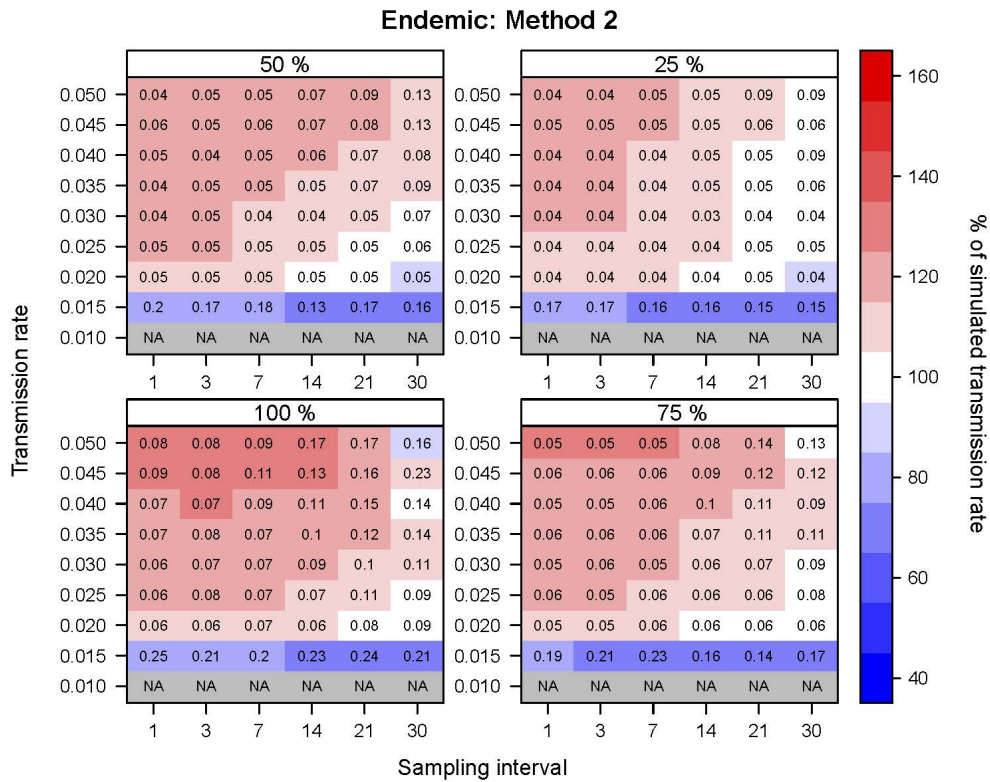

**Figure 16.** SIScom model, endemic situation, Method 2: Heatmaps showing the estimated transmission rates as percentage of the simulated transmission rate. The estimates are shown for four subsampling levels: 100%, 75%, 50% and 25%. Values in each cell show the relative standard deviation of the estimated rate divided by the simulated rate.
